# Supplementary material
Source: PubMed Central journal article supplement (PMC187866)

**A**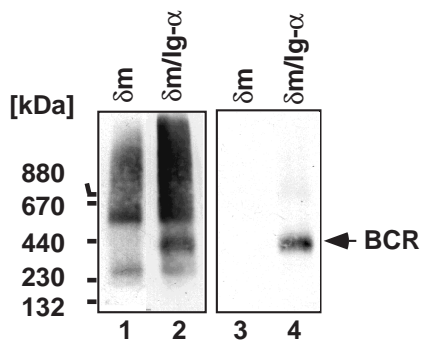**B**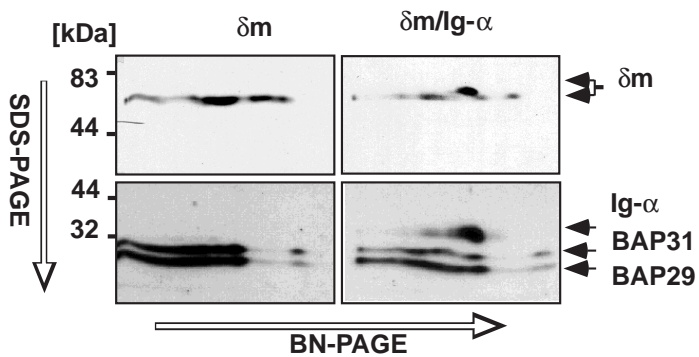

Supplement: pnas_100_17_9861__3.pdf [file pnas_100_17_9861__3.pdf]
